# Supplementary material for: Variable interaction specificity and symbiont performance in Panamanian Trachymyrmex and Sericomyrmex fungus-growing ants
Source: PubMed Central journal article supplement (PMC4262973; doi:10.1186/s12862-014-0244-6), 2014-12-04
Supplement: 12862_2014_244_MOESM2_ESM.pdf [file 12862_2014_244_MOESM2_ESM.pdf]

**Network analysis results**  
Relevant output from TCS v. 1.21 analysis

**Ant Networks**

**PARSIMONY PROBABILITY**

|                 |                             |
|-----------------|-----------------------------|
| For 1 step(s),  | P(90%) = 0.9993189000594782 |
| For 2 step(s),  | P(90%) = 0.9974565799863522 |
| For 3 step(s),  | P(90%) = 0.9947317351868009 |
| For 4 step(s),  | P(90%) = 0.9911062827467767 |
| For 5 step(s),  | P(90%) = 0.9865849716570294 |
| For 6 step(s),  | P(90%) = 0.9811775162679158 |
| For 7 step(s),  | P(90%) = 0.9748957304418876 |
| For 8 step(s),  | P(90%) = 0.9677537854640341 |
| For 9 step(s),  | P(90%) = 0.9597681955032399 |
| For 10 step(s), | P(90%) = 0.9509577530083807 |
| For 11 step(s), | P(90%) = 0.9413434557124126 |
| For 12 step(s), | P(90%) = 0.9309484239440748 |
| For 13 step(s), | P(90%) = 0.9197978082486945 |
| For 14 step(s), | P(90%) = 0.9079186878391192 |
| For 15 step(s), | P(90%) = 0.8953399604523783 |

**RUN SETTINGS**

Calculated maximum connection steps at 90% = 14  
Gaps treated as fifth state

**HAPLOTYPES**

Number of haplotypes = 27

Haplotype list:

|           |   |                                       |
|-----------|---|---------------------------------------|
| - Tsp1_6  | : | Tsp1_4                                |
| - Tsp1_3  | : | Tsp1_5                                |
| - Tsp1_7  | : |                                       |
| - Tsp1_11 | : |                                       |
| - Tsp1_13 | : |                                       |
| - Tsp1_8  | : |                                       |
| - Tsp1_10 | : |                                       |
| - Tsp1_12 | : |                                       |
| - Sam2    | : | Sam5                                  |
| - Sam3    | : |                                       |
| - Sam1    | : | Sam6                                  |
| - Sam4    | : | Sam8                                  |
| - Sam7    | : |                                       |
| - Sam9    | : |                                       |
| - Sam10   | : |                                       |
| - Tsp3_8  | : | Tsp3_13 Tsp3_14 Tsp3_12 Tsp3_7 Tsp3_9 |
| - Tsp3_10 | : |                                       |
| - Tsp3_11 | : |                                       |
| - Aocto   | : |                                       |

- Acephal :
  - Tsp4\_9 : Tsp4\_10 Tsp4\_16
  - Tsp4\_19 : Tsp4\_17
  - Tsp4\_18 :
  - Tsp4\_13 :
  - Tsp4\_12 :
  - Tsp4\_15 :

**OUTGROUP WEIGHTS**

\*\*\* Network 1 - *T. cornetzi* sp. 2

Tsp1\_7 weight = 0.14285714285714285  
Tsp1\_6 weight = 0.5714285714285714  
Tsp1\_3 weight = 0.2857142857142857  
Total weight = 3.5  
Biggest outgroup probability is Tsp1\_6  
(0.5714285714285714)

\*\*\* Network 2 - *T. cornetzi* sp. 3

Tsp1\_11 weight = 0.5  
Tsp1\_13 weight = 0.5  
Total weight = 1.0  
Biggest outgroup probability is Tsp1\_11 (0.5)

\*\*\* Network 3 - *T. cornetzi* sp. 1

Tsp1\_12 weight = 0.16666666666666666  
Tsp1\_8 weight = 0.66666666666666666  
Tsp1\_10 weight = 0.16666666666666666  
Total weight = 3.0  
Biggest outgroup probability is Tsp1\_8  
(0.66666666666666666)

\*\*\* Network 4 - *Sericomyrmex amabilis*

Sam4 weight = 0.2608695652173913  
Sam7 weight = 0.043478260869565216  
Sam10 weight = 0.043478260869565216  
Sam9 weight = 0.043478260869565216  
Sam1 weight = 0.08695652173913043  
Sam2 weight = 0.2608695652173913  
Sam3 weight = 0.2608695652173913  
Total weight = 11.5  
Biggest outgroup probability is Sam4  
(0.2608695652173913)

\*\*\* Network 5 - *Trachymyrmex* sp. 3

Tsp3\_11 weight = 0.05555555555555555  
Tsp3\_8 weight = 0.88888888888888888  
Tsp3\_10 weight = 0.05555555555555555  
Total weight = 9.0  
Biggest outgroup probability is Tsp3\_8  
(0.88888888888888888)

\*\*\* Network 6 - *Acromyrmex octospinosus*  
Aocto        weight = 1.0  
Total weight = 1.0  
Biggest outgroup probability is Aocto        (1.0)

\*\*\* Network 7 - *Atta cephalotes*  
Acephal     weight = 1.0  
Total weight = 1.0  
Biggest outgroup probability is Acephal     (1.0)

\*\*\* Network 8 - *Trachymyrmex zeteki*  
Tsp4\_13     weight = 0.055555555555555555  
Tsp4\_18     weight = 0.055555555555555555  
Tsp4\_9       weight = 0.444444444444444444  
Tsp4\_19     weight = 0.333333333333333333  
Tsp4\_15     weight = 0.055555555555555555  
Tsp4\_12     weight = 0.055555555555555555  
Total weight = 9.0  
Biggest outgroup probability is Tsp4\_9  
(0.444444444444444444)

## Fungus Networks

### PARSIMONY PROBABILITY

|                 |                             |
|-----------------|-----------------------------|
| For 1 step(s),  | P(90%) = 0.9995449982421768 |
| For 2 step(s),  | P(90%) = 0.9981351488585823 |
| For 3 step(s),  | P(90%) = 0.9961097618736373 |
| For 4 step(s),  | P(90%) = 0.9934174087409977 |
| For 5 step(s),  | P(90%) = 0.9900569565895634 |
| For 6 step(s),  | P(90%) = 0.9860342715838435 |
| For 7 step(s),  | P(90%) = 0.9813559773087801 |
| For 8 step(s),  | P(90%) = 0.9760298946915947 |
| For 9 step(s),  | P(90%) = 0.9700651607333624 |
| For 10 step(s), | P(90%) = 0.9634721986474911 |
| For 11 step(s), | P(90%) = 0.9562626853327999 |
| For 12 step(s), | P(90%) = 0.9484495172941622 |
| For 13 step(s), | P(90%) = 0.9400467724843066 |
| For 14 step(s), | P(90%) = 0.9310696681317402 |
| For 15 step(s), | P(90%) = 0.9215345147734416 |
| For 16 step(s), | P(90%) = 0.9114586666886794 |
| For 17 step(s), | P(90%) = 0.900860468944134  |
| For 18 step(s), | P(90%) = 0.8897592012770762 |

### RUN SETTINGS

Calculated maximum connection steps at 90% = 17  
Gaps treated as fifth state

### HAPLOTYPES

Number of haplotypes = 34

#### Haplotype list:

- Sam1 :
- Sam9 :
- Sam7 :
- Sam2 :
- Sam8 :
- Sam6 :
- Sam4 :
- Sam10 :
- Sam5 :
- Sam3 :
- Tsp1\_13 :
- Tsp4\_19 :
- Tsp1\_7 :
- Tsp4\_17 :
- Tsp4\_18 :
- Tsp3\_13 :
- Tsp3\_14 : Tsp3\_7 Tsp3\_15 Tsp3\_9 Tsp3\_10 Tsp3\_8
- Tsp3\_11 :
- Tsp3\_12 :

- Tsp4\_15 :
- Tsp1\_6 :
- Tsp4\_9 :
- Tsp4\_16 :
- Tsp4\_12 :
- Tsp1\_11 :
- Tsp1\_4 :
- Tsp1\_5 :
- Tsp4\_13 :
- Tsp4\_10 :
- Acephal :
- Aocto :
- Tsp1\_12 :
- Tsp1\_8 :
- Tsp1\_3 : Tsp1\_10

**OUTGROUP WEIGHTS**

\*\*\* Network 1 - Cultivar group A

Sam5 weight = 0.08333333333333333  
 Sam10 weight = 0.08333333333333333  
 Sam6 weight = 0.08333333333333333  
 Sam8 weight = 0.08333333333333333  
 Sam2 weight = 0.08333333333333333  
 Sam7 weight = 0.08333333333333333  
 Sam9 weight = 0.08333333333333333  
 Sam1 weight = 0.08333333333333333  
 Sam4 weight = 0.16666666666666666  
 Sam3 weight = 0.16666666666666666

Total weight = 6.0

Biggest outgroup probability is Sam4 (0.16666666666666666)

\*\*\* Network 2 - Cultivar group C

Tsp4\_18 weight = 0.2  
 Tsp1\_7 weight = 0.2  
 Tsp4\_19 weight = 0.2  
 Tsp1\_13 weight = 0.2  
 Tsp4\_17 weight = 0.2

Total weight = 2.5

Biggest outgroup probability is Tsp4\_18 (0.2)

\*\*\* Network 3 - Cultivar group B

Tsp3\_12 weight = 0.03125  
 Tsp3\_13 weight = 0.03125  
 Tsp3\_14 weight = 0.5  
 Tsp3\_11 weight = 0.4375

Total weight = 16.0

Biggest outgroup probability is Tsp3\_14 (0.5)

\*\*\* Network 4 - Cultivar group G

Tsp4\_15 weight = 1.0

Total weight = 1.0

Biggest outgroup probability is Tsp4\_15 (1.0)

\*\*\* Network 5 - Cutlivar group D

Tsp4\_10      weight = 0.058823529411764705  
Tsp1\_5        weight = 0.058823529411764705  
Tsp1\_4        weight = 0.058823529411764705  
Tsp1\_11      weight = 0.11764705882352941  
Tsp4\_12      weight = 0.058823529411764705  
Tsp1\_6        weight = 0.058823529411764705  
Tsp4\_9        weight = 0.11764705882352941  
Tsp4\_16      weight = 0.23529411764705882  
Tsp4\_13      weight = 0.23529411764705882  
Total weight = 8.5

Biggest outgroup probability is Tsp4\_16 (0.23529411764705882)

\*\*\* Network 6 - *Leucoagaricus gongylophorus*

Acephal      weight = 0.5  
Aocto         weight = 0.5  
Total weight = 1.0

Biggest outgroup probability is Acephal (0.5)

\*\*\* Network 7 - Cultivar group F

Tsp1\_12      weight = 0.5  
Tsp1\_8        weight = 0.5  
Total weight = 1.0

Biggest outgroup probability is Tsp1\_12 (0.5)

\*\*\* Network 8 - Cultivar group E

Tsp1\_3        weight = 1.0  
Total weight = 2.0

Biggest outgroup probability is Tsp1\_3 (1.0)
